# Supplementary material for: Nickel quercetinase, a “promiscuous” metalloenzyme: metal incorporation and metal ligand substitution studies
Source: PubMed Central journal article supplement (PMC4416304; doi:10.1186/s12858-015-0039-4), 2015-04-23
Supplement: 12858_2015_39_MOESM1_ESM.pdf [file 12858_2015_39_MOESM1_ESM.pdf]

**Additional file 1:**

**Electrophoretic analysis of QueD proteins.**

**Figure S1. Strep-tagged Ni-QueD from recombinant *E. coli* (A), and QueD isolated from *Streptomyces* sp. FLA (B).**

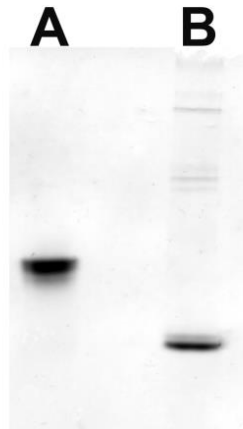

Native polyacrylamide gel electrophoresis (PAGE) was performed on a 10% polyacrylamide gel; the gel was stained with Coomassie blue. The identity of the protein isolated from the wild-type *Streptomyces* strain was verified by in-gel tryptic digestion and MALDI-MS analysis.
