# Supplementary material for: Nickel quercetinase, a “promiscuous” metalloenzyme: metal incorporation and metal ligand substitution studies
Source: PubMed Central journal article supplement (PMC4416304; doi:10.1186/s12858-015-0039-4), 2015-04-23
Supplement: 12858_2015_39_MOESM2_ESM.pdf [file 12858_2015_39_MOESM2_ESM.pdf]

**Additional file 2:****Metal-related catalytic activity of QueD.****Table S1. Specific activities of *Streptomyces quercetinase* if completely loaded with a single metal species.**

To extrapolate the specific activities of QueD proteins fully occupied with the indicated metal, it was assumed that the specific activity measured for proteins with mixed metal occupancy is a linear correlation of metal content and metal-related specific activity. 26 preparations of recombinant QueD with different metal occupancies were analyzed. The coefficient of determination  $R^2$  is 0.848. Due to highly variable Mn contents and very low Zn contents in the preparations, errors are very large.

| <b>QueD form</b> | <b>Extrapolated metal-related<br/>specific activity<br/>(U mg<sup>-1</sup>)</b> | <b>Relative<br/>error<br/>(%)</b> |
|------------------|---------------------------------------------------------------------------------|-----------------------------------|
| <b>Co-QueD</b>   | 28.5                                                                            | 49.8                              |
| <b>Cu-QueD</b>   | $\ll 10^{-10}$                                                                  | $\infty$                          |
| <b>Fe-QueD</b>   | $\ll 10^{-10}$                                                                  | $\infty$                          |
| <b>Mn-QueD</b>   | 46.3                                                                            | 84.5                              |
| <b>Ni-QueD</b>   | 183.3                                                                           | 8.4                               |
| <b>Zn-QueD</b>   | 79.4                                                                            | 75.7                              |
