# Supplementary material for: Nickel quercetinase, a “promiscuous” metalloenzyme: metal incorporation and metal ligand substitution studies
Source: PubMed Central journal article supplement (PMC4416304; doi:10.1186/s12858-015-0039-4), 2015-04-23
Supplement: 12858_2015_39_MOESM3_ESM.pdf [file 12858_2015_39_MOESM3_ESM.pdf]

**Additional file 3:****Purification of QueD from *Streptomyces* sp. FLA.****Table S2: Enrichment of quercetinase QueD from *Streptomyces* sp. FLA.**

Starting material was 35 g of wet biomass.

| <b>Fraction</b>                                     | <b>Activity<br/>(U)</b> | <b>Spec.<br/>activity<br/>(U/mg)</b> | <b>Enrichment<br/>(-fold)</b> | <b>Yield<br/>(%)</b> |
|-----------------------------------------------------|-------------------------|--------------------------------------|-------------------------------|----------------------|
| Crude extract supernatant                           | 216.2                   | 0.11                                 | 1.00                          | 100                  |
| Supernatant after ammonium sulfate<br>precipitation | 244.8                   | 0.14                                 | 1.2                           | 113                  |
| Phenyl-Sepharose CL-4B                              | 99.5                    | 0.71                                 | 6.3                           | 46.1                 |
| Q Sepharose Fast Flow                               | 31.1                    | 6.15                                 | 54.0                          | 14.4                 |
| Source 15Q                                          | 8.0                     | 48.63                                | 427.7                         | 3.7                  |
