# Supplementary material for: Nickel quercetinase, a “promiscuous” metalloenzyme: metal incorporation and metal ligand substitution studies
Source: PubMed Central journal article supplement (PMC4416304; doi:10.1186/s12858-015-0039-4), 2015-04-23
Supplement: 12858_2015_39_MOESM4_ESM.pdf [file 12858_2015_39_MOESM4_ESM.pdf]

#### Additional file 4:

### Production of QueD-EGFP fusion protein by cell-free protein synthesis (CFPS), and quercetinase activity of QueD-EGFP in the CFPS reactions.

#### Figure S2: Cell-free synthesis of QueD-EGFP in the presence of metal ions.

Average fluorescence emission of the fusion protein QueD-EGFP in cell-free protein synthesis (CFPS) reactions which contained the indicated  $M^{2+}$  ions at varying concentrations (A–E), and without additional metal ions (F). Fluorescence emission at 510–570 nm upon excitation at 490 nm was determined every 20 min in a Glomax<sup>®</sup>-multi+ microplate reader (Promega). RFU, relative fluorescence units.

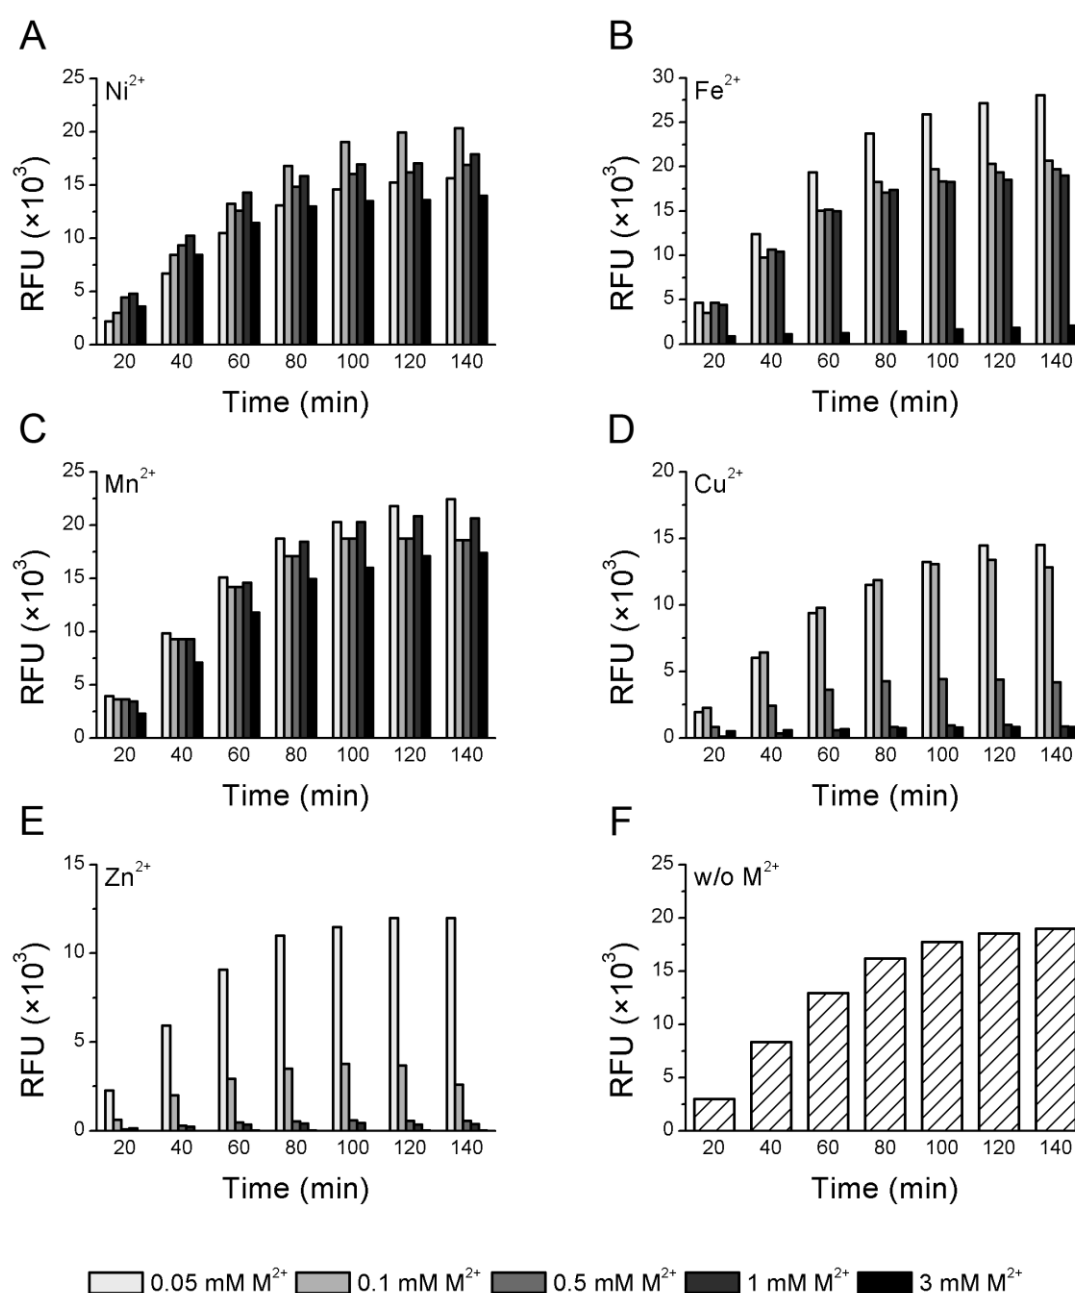

**Table S3: Specific quercetinase activity of QueD-EGFP fusion proteins in CFPS reactions.**

| Concentration of M <sup>2+</sup> in CFPS (mM) | Specific activity (mU mg <sup>-1</sup> ) after CFPS in the presence of: <sup>a</sup> |                  |                  |                   |                  |
|-----------------------------------------------|--------------------------------------------------------------------------------------|------------------|------------------|-------------------|------------------|
|                                               | Ni <sup>2+</sup>                                                                     | Mn <sup>2+</sup> | Fe <sup>2+</sup> | Cu <sup>2+</sup>  | Zn <sup>2+</sup> |
| 0.05                                          | 75                                                                                   | 3.2              | 1.7              | 0.7               | 0.6              |
| 0.1                                           | 194                                                                                  | 4.2              | 1.4              | 0.7               | 0.6              |
| 0.5                                           | 906                                                                                  | 16.7             | 1.8              | b.d. <sup>b</sup> | 0.9              |
| 1.0                                           | 1580                                                                                 | 25.9             | 4.3              | 2.1               | b.d.             |
| 3.0                                           | 1123                                                                                 | 32.8             | 1.5              | 1.4               | b.d.             |

<sup>a</sup> Quercetinase activity was measured after 3 h of incubation directly in the CFPS system, which contains *E. coli* cell extracts (protein concentrations in the CFPS assays were in the range of 20–40 mg ml<sup>-1</sup>). The specific quercetinase activity of QueD-EGFP after CFPS performed without M<sup>2+</sup> supplementation was 1.8 mU mg<sup>-1</sup>. All activity data were corrected for spontaneous quercetin oxidation in presence of the same concentration of the respective metal ion.
