# Supplementary material for: Nickel quercetinase, a “promiscuous” metalloenzyme: metal incorporation and metal ligand substitution studies
Source: PubMed Central journal article supplement (PMC4416304; doi:10.1186/s12858-015-0039-4), 2015-04-23
Supplement: 12858_2015_39_MOESM5_ESM.pdf [file 12858_2015_39_MOESM5_ESM.pdf]

**Additional file 5: Verification of QueD synthesis by the CFPS system.**

**Figure S4.** Western blot of denaturing polyacrylamide gel of QueD proteins produced by cell-free protein synthesis.

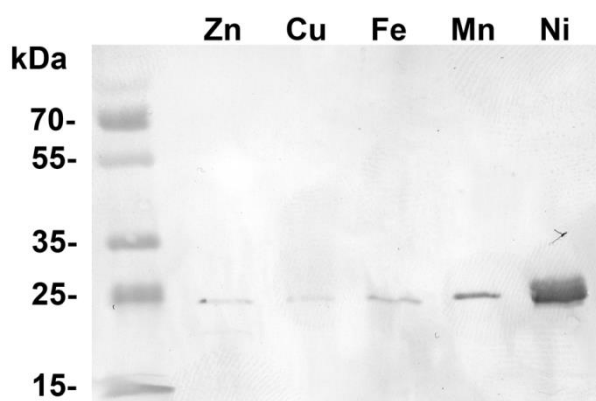

**Figure S4.** QueD proteins were produced by cell-free protein synthesis in the presence of various  $M^{2+}$  ions (1 mL scale) and purified by Strep-tactin affinity chromatography. The metal ion added to the cell-free protein synthesis reaction is indicated above the lanes. Denaturing (sodium dodecyl sulfate) PAGE was performed as described by Laemmli [1], using an overall acrylamide concentration of 12.5% and a crosslinker concentration of 2.6% in the separating gel. Semi-dry electroblotting was performed according to Towbin *et al.* [2]. Immunodetection of Strep-tagged proteins was carried out with primary Anti-Strep IgG1 mouse antibodies (IBA) and secondary Anti-mouse IgG antibodies fused to alkaline phosphatase (Sigma-Aldrich).

1. Laemmli UK: **Cleavage of structural proteins during the assembly of the head of bacteriophage T4.** *Nature* 1970, **227**:680–685.
2. Towbin H, Staehelin T, Gordon J: **Electrophoretic transfer of proteins from polyacrylamide gels to nitrocellulose sheets: procedure and some applications.** *Proc Natl Acad Sci USA* 1979, **76**:4350–4354.
